# Supplementary material for: Serologic and Molecular Diagnosis of Anaplasma platys and Ehrlichia canis Infection in Dogs in an Endemic Region
Source: PubMed Central journal article supplement (PMC7350331; doi:10.3390/pathogens9060488), 2020-06-19
Supplement: pathogens-09-00488-s001.pdf [file pathogens-09-00488-s001.pdf]

## **Supplemental File-1**

This supplemental file presents tables (Tables S1-S15) showing comparison of association of various relevant clinical pathology parameters from a subset of dogs with *A. platys* and *E. canis* POC and PCR test results and Table S16 showing the reference values used in this study. Contingency tables were prepared and analyzed using Fisher's exact test in GraphPad QuickCalcs software. *A. platys* and *E. canis* POC and PCR test results were compared with each of the clinical pathology changes. Exact P values are shown at the bottom of each table. Observations with P values equal to or less than 0.05 is considered significant and marked with an asterisk (\*).

### **List of tables in this file**

**Table S1 A-D: Packed cell volume (PCV)**

**Table S2 A-D: Red blood cell (RBC) count**

**Table S3 A-D: Hemoglobin (Hb) concentration**

**Table S4 A-D Hematocrit values**

**Table S5 A-D: Low Plasma protein concentration**

**Table S6 A-D: High Plasma protein concentration**

**Table S7 A-D: Leukopenia**

**Table S8 A-D: Leukocytosis**

**Table S9 A-D: Lymphopenia**

**Table S10 A-D: Lymphocytosis**

**Table S11 A-D: Monocytosis**

**Table S12 A-D: Neutropenia**

**Table S13 A-D: Neutrophilia**

**Table S14 A-D: Eosinophilia**

**Table S15 A-D: Thrombocytopenia**

**Table S16: Reference values for the clinical pathology parameters**

**Table S1 A-D: Packed cell volume (PCV)**

**Table S1A**

|                 | <b>Low PCV</b> | <b>Normal PCV</b> | <b>Total</b> |
|-----------------|----------------|-------------------|--------------|
| <b>AP PCR +</b> | 18             | 20                | 38           |
| <b>AP PCR -</b> | 26             | 73                | 99           |
| <b>Total</b>    | 44             | 93                | 137          |

*(P = 0.0244)\**

**Table S1B**

|                 | <b>Low PCV</b> | <b>Normal PCV</b> | <b>Total</b> |
|-----------------|----------------|-------------------|--------------|
| <b>AP POC+</b>  | 12             | 20                | 32           |
| <b>AP POC -</b> | 24             | 43                | 67           |
| <b>Total</b>    | 36             | 63                | 99           |

*(P= 1)*

**Table S1C**

|                 | <b>Low PCV</b> | <b>Normal PCV</b> | <b>Total</b> |
|-----------------|----------------|-------------------|--------------|
| <b>EC PCR +</b> | 18             | 67                | 85           |
| <b>EC PCR -</b> | 26             | 26                | 52           |
| <b>Total</b>    | 44             | 93                | 137          |

*(P= 0.0007)\**

**Table S1 D**

|                 | <b>Low PCV</b> | <b>Normal PCV</b> | <b>Total</b> |
|-----------------|----------------|-------------------|--------------|
| <b>EC POC +</b> | 30             | 35                | 65           |
| <b>EC POC -</b> | 6              | 28                | 34           |
| <b>Total</b>    | 36             | 63                | 99           |

*(P = 0.0077)\**

Low PCV was significantly associated with AP PCR, EC PCR and EC POC positive test results

**Table S2 A-D: Red blood cell (RBC) count**

**Table S2A**

|                 | <b>Low RBC count</b> | <b>Normal RBC count</b> | <b>Total</b> |
|-----------------|----------------------|-------------------------|--------------|
| <b>AP PCR +</b> | 12                   | 25                      | 37           |
| <b>AP PCR -</b> | 28                   | 81                      | 109          |
| <b>Total</b>    | 40                   | 106                     | 146          |

*(P = 0.5225)*

**Table S2B**

|                | <b>Low RBC count</b> | <b>Normal</b> | <b>Total</b> |
|----------------|----------------------|---------------|--------------|
| <b>AP POC+</b> | 9                    | 22            | 31           |
| <b>AP POC-</b> | 15                   | 53            | 68           |
| <b>Total</b>   | 24                   | 75            | 99           |

*(P = 0.4592)*

**Table S2C**

|                 | <b>Low RBC count</b> | <b>Normal</b> | <b>Total</b> |
|-----------------|----------------------|---------------|--------------|
| <b>EC PCR +</b> | 19                   | 32            | 51           |
| <b>EC PCR -</b> | 11                   | 74            | 85           |
| <b>Total</b>    | 30                   | 106           | 136          |

*(P = 0.0013)\**

**Table S2D**

|                  | <b>Low RBC count</b> | <b>Normal</b> | <b>Total</b> |
|------------------|----------------------|---------------|--------------|
| <b>EC SNAP+</b>  | 20                   | 45            | 65           |
| <b>EC SNAP -</b> | 4                    | 30            | 34           |
| <b>Total</b>     | 24                   | 75            | 99           |

*(P = 0.0479)\**

Low RBC count was significantly associated with EC PCR and EC POC positive test results

**Table S3 A-D: Hemoglobin (Hb) concentration**

**Table S3A**

|                 | <b>Low Hb</b> | <b>Normal-High Hb</b> | <b>Total</b> |
|-----------------|---------------|-----------------------|--------------|
| <b>AP PCR +</b> | 18            | 20                    | 38           |
| <b>AP PCR -</b> | 18            | 82                    | 100          |
| <b>Total</b>    | 36            | 102                   | 138          |

*(P = 0.0009)\**

**Table S3B**

|                | <b>Low Hb</b> | <b>Normal-high Hb</b> | <b>Total</b> |
|----------------|---------------|-----------------------|--------------|
| <b>AP POC+</b> | 11            | 21                    | 32           |
| <b>AP POC-</b> | 17            | 51                    | 68           |
| <b>Total</b>   | 28            | 72                    | 100          |

*(P = 0.3484)*

**Table S3C**

|                 | <b>Low Hb</b> | <b>Normal-high Hb</b> | <b>Total</b> |
|-----------------|---------------|-----------------------|--------------|
| <b>EC PCR +</b> | 24            | 28                    | 52           |
| <b>EC PCR -</b> | 12            | 76                    | 88           |
| <b>Total</b>    | 36            | 104                   | 140          |

*(P = 0.0001)\**

**Table S3D**

|                 | <b>Low Hb</b> | <b>Normal-high Hb</b> | <b>Total</b> |
|-----------------|---------------|-----------------------|--------------|
| <b>EC POC +</b> | 24            | 42                    | 66           |
| <b>EC POC-</b>  | 4             | 30                    | 34           |
| <b>Total</b>    | 28            | 72                    | 100          |

*(P = 0.01)\**

Low hemoglobin concentration is significantly associated with AP PCR, EC PCR and EC POC positive test results

## Table S4 A-D Hematocrit values

### Table S4A

|              | Low HCT   | Normal    | Total      |
|--------------|-----------|-----------|------------|
| AP PCR +     | 18        | 20        | 38         |
| AP PCR -     | 20        | 75        | 95         |
| <b>Total</b> | <b>38</b> | <b>95</b> | <b>133</b> |

( $P = 0.0051$ )\*

### Table S4B

|              | Low HCT   | Normal    | Total     |
|--------------|-----------|-----------|-----------|
| AP POC+      | 11        | 20        | 31        |
| AP POC -     | 19        | 47        | 66        |
| <b>Total</b> | <b>30</b> | <b>67</b> | <b>97</b> |

( $P = 0.6380$ )

### Table S4C

|              | Low HCT   | Normal    | Total      |
|--------------|-----------|-----------|------------|
| EC PCR +     | 26        | 25        | 51         |
| EC PCR -     | 12        | 70        | 82         |
| <b>Total</b> | <b>38</b> | <b>95</b> | <b>133</b> |

( $P = 0.0001$ )\*

### Table S4D

|              | Low HCT   | Normal    | Total     |
|--------------|-----------|-----------|-----------|
| EC POC +     | 26        | 38        | 64        |
| EC POC -     | 4         | 29        | 33        |
| <b>Total</b> | <b>30</b> | <b>67</b> | <b>97</b> |

( $P = 0.0050$ )\*

Low hematocrit values are significantly associated with AP PCR, EC PCR and EC POC positive test results

**Table S5 A-D: Low Plasma protein concentration**

**Table S5A**

|                 | <b>Low plasma protein</b> | <b>Normal</b> | <b>Total</b> |
|-----------------|---------------------------|---------------|--------------|
| <b>AP PCR +</b> | 5                         | 30            | 35           |
| <b>AP PCR -</b> | 10                        | 51            | 61           |
| <b>Total</b>    | 15                        | 81            | 96           |

*(P = 1)*

**Table S5B**

|                 | <b>Low plasma protein</b> | <b>Normal</b> | <b>Total</b> |
|-----------------|---------------------------|---------------|--------------|
| <b>AP POC+</b>  | 12                        | 19            | 31           |
| <b>AP POC -</b> | 8                         | 40            | 48           |
| <b>Total</b>    | 20                        | 59            | 79           |

*(P= 0.0359)\**

**Table S5C**

|                 | <b>Low plasma protein</b> | <b>Normal</b> | <b>Total</b> |
|-----------------|---------------------------|---------------|--------------|
| <b>EC PCR +</b> | 8                         | 31            | 39           |
| <b>EC PCR -</b> | 7                         | 50            | 57           |
| <b>Total</b>    | 15                        | 81            | 96           |

*(P = 0.3913)*

**Table S5D**

|                 | <b>Low plasma protein</b> | <b>Normal</b> | <b>Total</b> |
|-----------------|---------------------------|---------------|--------------|
| <b>EC POC +</b> | 8                         | 54            | 62           |
| <b>EC POC -</b> | 1                         | 38            | 39           |
| <b>Total</b>    | 9                         | 92            | 101          |

*(P = 0.1478)*

Low Plasma protein concentration was significantly associated with AP POC positive test results.

**Table S6 A-D: High Plasma protein concentration**

**Table S6A**

|                 | <b>High Plasma protein concentration</b> | <b>Normal</b> | <b>Total</b> |
|-----------------|------------------------------------------|---------------|--------------|
| <b>AP PCR +</b> | 3                                        | 30            | 33           |
| <b>AP PCR -</b> | 39                                       | 51            | 90           |
| <b>Total</b>    | 42                                       | 81            | 123          |

*(P = 0.0002)*

**Table S6B**

|                 | <b>High Plasma protein concentration</b> | <b>Normal</b> | <b>Total</b> |
|-----------------|------------------------------------------|---------------|--------------|
| <b>AP POC+</b>  | 12                                       | 19            | 31           |
| <b>AP POC -</b> | 20                                       | 40            | 60           |
| <b>Total</b>    | 32                                       | 59            | 91           |

*(P = 0.6481)*

**Table S6C**

|                 | <b>High Plasma protein concentration</b> | <b>Normal</b> | <b>Total</b> |
|-----------------|------------------------------------------|---------------|--------------|
| <b>EC PCR +</b> | 13                                       | 31            | 44           |
| <b>EC PCR -</b> | 29                                       | 50            | 79           |
| <b>Total</b>    | 42                                       | 81            | 123          |

*(P = 0.5521)*

**Table S6D**

|                 | <b>High Plasma protein concentration</b> | <b>Normal</b> | <b>Total</b> |
|-----------------|------------------------------------------|---------------|--------------|
| <b>EC POC+</b>  | 30                                       | 29            | 59           |
| <b>EC POC -</b> | 2                                        | 30            | 32           |
| <b>Total</b>    | 32                                       | 59            | 91           |

*(P = 0.0001)*

High plasma protein concentration is significantly associated with AP PCR and EC POC positive test results

**Table S7 A-D: Leukopenia****Table S7 A**

|                 | <b>Leukopenia</b> | <b>Normal</b> | <b>Total</b> |
|-----------------|-------------------|---------------|--------------|
| <b>AP PCR +</b> | 3                 | 31            | 34           |
| <b>AP PCR -</b> | 9                 | 82            | 91           |
| <b>Total</b>    | 12                | 113           | 125          |

*(P = 1)*

**Table S7 B**

|                 | <b>Leukopenia</b> | <b>Normal</b> | <b>Total</b> |
|-----------------|-------------------|---------------|--------------|
| <b>AP POC+</b>  | 4                 | 27            | 31           |
| <b>AP POC -</b> | 5                 | 55            | 60           |
| <b>Total</b>    | 9                 | 82            | 91           |

*(P = 0.4837)*

**Table S7 C**

|                 | <b>Leukopenia</b> | <b>Normal</b> | <b>Total</b> |
|-----------------|-------------------|---------------|--------------|
| <b>EC PCR +</b> | 6                 | 40            | 46           |
| <b>EC PCR -</b> | 6                 | 73            | 79           |
| <b>Total</b>    | 12                | 113           | 125          |

*(P = 0.3554)*

**Table S7 D**

|                | <b>Leukopenia</b> | <b>Normal</b> | <b>Total</b> |
|----------------|-------------------|---------------|--------------|
| <b>EC POC+</b> | 8                 | 54            | 62           |
| <b>EC POC-</b> | 1                 | 38            | 39           |
| <b>Total</b>   | 9                 | 92            | 101          |

*(P= 0.1478)*



### Table S8 A-D: Leukocytosis

Table S8 A

|              | Leukocytosis | Normal     | Total      |
|--------------|--------------|------------|------------|
| AP PCR +     | 5            | 31         | 36         |
| AP PCR -     | 3            | 84         | 87         |
| <b>Total</b> | <b>8</b>     | <b>115</b> | <b>123</b> |

(*P* = 0.0466)\*

Table S8 B

|              | Leukocytosis | Normal    | Total     |
|--------------|--------------|-----------|-----------|
| AP POC+      | 1            | 27        | 28        |
| AP POC -     | 8            | 55        | 63        |
| <b>Total</b> | <b>9</b>     | <b>82</b> | <b>91</b> |

(*P* = 0.2655)

Table S8 C

|              | Leukocytosis | Normal     | Total      |
|--------------|--------------|------------|------------|
| EC PCR +     | 6            | 40         | 46         |
| EC PCR -     | 7            | 73         | 80         |
| <b>Total</b> | <b>13</b>    | <b>113</b> | <b>126</b> |

(*P* = 0.5456)

Table S8 D

|              | Leukocytosis | Normal    | Total     |
|--------------|--------------|-----------|-----------|
| EC POC+      | 4            | 53        | 57        |
| EC POC -     | 3            | 28        | 31        |
| <b>Total</b> | <b>7</b>     | <b>81</b> | <b>88</b> |

(*P* = 0.6933)

Leukocytosis is significantly associated with AP PCR positive test results.

### Table S9 A-D: Lymphopenia

Table S9 A

|              | Lymphopenia | Normal | Total |
|--------------|-------------|--------|-------|
| AP PCR +     | 2           | 31     | 33    |
| AP PCR -     | 13          | 84     | 97    |
| <b>Total</b> | 15          | 115    | 130   |

(*P* = 0.3526)

Table S9 B

|              | Lymphopenia | Normal | Total |
|--------------|-------------|--------|-------|
| AP POC+      | 4           | 24     | 28    |
| AP POC -     | 8           | 57     | 65    |
| <b>Total</b> | 12          | 81     | 93    |

(*P* = 0.7486)

Table S9 C

|              | Lymphopenia | Normal | Total |
|--------------|-------------|--------|-------|
| EC PCR +     | 6           | 38     | 44    |
| EC PCR -     | 9           | 77     | 86    |
| <b>Total</b> | 15          | 115    | 130   |

(*P* = 0.5761)

Table S9 D

|              | Lymphopenia | Normal | Total |
|--------------|-------------|--------|-------|
| EC POC +     | 9           | 53     | 62    |
| EC POC -     | 28          | 3      | 31    |
| <b>Total</b> | 37          | 56     | 93    |

(*P* = 0.0001)

Lymphopenia is significantly associated with EC POC positive test results.

**Table S10 A-D: Lymphocytosis**

**Table S10 B**

|                 | <b>Lymphocytosis</b> | <b>Normal</b> | <b>Total</b> |
|-----------------|----------------------|---------------|--------------|
| <b>AP PCR +</b> | 5                    | 31            | 36           |
| <b>AP PCR -</b> | 3                    | 84            | 87           |
| <b>Total</b>    | 8                    | 115           | 123          |

*(P = 0.0466)\**

**Table S10 B**

|                | <b>Lymphocytosis</b> | <b>Normal</b> | <b>Total</b> |
|----------------|----------------------|---------------|--------------|
| <b>AP POC+</b> | 4                    | 24            | 28           |
| <b>AP POC-</b> | 3                    | 57            | 60           |
| <b>Total</b>   | 7                    | 81            | 88           |

*(P=0.2024)*

**Table S10 C**

|                 | <b>Lymphocytosis</b> | <b>Normal</b> | <b>Total</b> |
|-----------------|----------------------|---------------|--------------|
| <b>EC PCR +</b> | 8                    | 38            | 46           |
| <b>EC PCR -</b> | 0                    | 77            | 77           |
| <b>Total</b>    | 8                    | 115           | 123          |

*(P = 0.0003)\**

**Table S10 D**

|                 | <b>Lymphocytosis</b> | <b>Normal</b> | <b>Total</b> |
|-----------------|----------------------|---------------|--------------|
| <b>EC POC +</b> | 4                    | 53            | 57           |
| <b>EC POC -</b> | 3                    | 28            | 31           |
| <b>Total</b>    | 7                    | 81            | 88           |

*(P = 0.6933).*

Lymphocytosis is significantly associated with AP PCR and EC PCR positive test results

**Table S11 A-D: Monocytosis**

**Table S11 A**

|                 | <b>Monocytosis</b> | <b>Normal</b> | <b>Total</b> |
|-----------------|--------------------|---------------|--------------|
| <b>AP PCR +</b> | 2                  | 31            | 33           |
| <b>AP PCR -</b> | 2                  | 85            | 87           |
| <b>Total</b>    | 4                  | 116           | 120          |

*(P = 0.3032)*

**Table S11 B**

|                 | <b>Monocytosis</b> | <b>Normal</b> | <b>Total</b> |
|-----------------|--------------------|---------------|--------------|
| <b>AP POC+</b>  | 0                  | 26            | 26           |
| <b>AP POC -</b> | 2                  | 60            | 62           |
| <b>Total</b>    | 2                  | 86            | 88           |

*(P = 1)*

**Table S11 C**

|                 | <b>Monocytosis</b> | <b>Normal</b> | <b>Total</b> |
|-----------------|--------------------|---------------|--------------|
| <b>EC PCR +</b> | 4                  | 42            | 46           |
| <b>EC PCR -</b> | 0                  | 74            | 74           |
| <b>Total</b>    | 4                  | 116           | 120          |

*(P = 0.0199)\**

**Table S11 D**

|                 | <b>Monocytosis</b> | <b>Normal</b> | <b>Total</b> |
|-----------------|--------------------|---------------|--------------|
| <b>EC POC+</b>  | 2                  | 54            | 56           |
| <b>EC POC -</b> | 0                  | 32            | 32           |
| <b>Total</b>    | 2                  | 86            | 88           |

*(P= 0.5319)*

Monocytosis is significantly associated with EC PCR positive test results.

## Table S12 A-D: Neutropenia

### Table S12 A

|              | Neutropenia | Normal     | Total      |
|--------------|-------------|------------|------------|
| AP PCR +     | 1           | 32         | 33         |
| AP PCR -     | 3           | 89         | 92         |
| <b>Total</b> | <b>4</b>    | <b>121</b> | <b>125</b> |

( $P = 1$ )

### Table S12 B

|              | Neutropenia | Normal    | Total     |
|--------------|-------------|-----------|-----------|
| AP POC+      | 0           | 31        | 31        |
| AP POC -     | 2           | 58        | 60        |
| <b>Total</b> | <b>2</b>    | <b>89</b> | <b>91</b> |

( $P=0.5458$ )

### Table S12 C

|          | Neutropenia | Normal | Total |
|----------|-------------|--------|-------|
| EC PCR + | 1           | 45     | 46    |
| EC PCR - | 3           | 76     | 79    |

( $P = 1$ )

### Table S12 D

|              | Neutropenia | Normal    | Total     |
|--------------|-------------|-----------|-----------|
| EC POC +     | 1           | 61        | 62        |
| EC POC -     | 1           | 28        | 29        |
| <b>Total</b> | <b>2</b>    | <b>89</b> | <b>91</b> |

( $P = 0.5382$ )

### Table S13 A-D: Neutrophilia

Table S13 A

|              | Neutrophilia | Normal     | Total      |
|--------------|--------------|------------|------------|
| AP PCR +     | 5            | 32         | 37         |
| AP PCR -     | 8            | 89         | 97         |
| <b>Total</b> | <b>13</b>    | <b>121</b> | <b>134</b> |

( $P = 0.3466$ )

Table S13 B

|              | Neutrophilia | Normal    | Total     |
|--------------|--------------|-----------|-----------|
| AP POC+      | 1            | 31        | 32        |
| AP POC-      | 1            | 58        | 59        |
| <b>Total</b> | <b>2</b>     | <b>89</b> | <b>91</b> |

( $P = 1$ )

Table S13 C

|              | Neutrophilia | Normal     | Total      |
|--------------|--------------|------------|------------|
| EC PCR +     | 6            | 45         | 51         |
| EC PCR -     | 7            | 76         | 83         |
| <b>Total</b> | <b>13</b>    | <b>121</b> | <b>134</b> |

( $P = 0.5579$ )

Table S13 D

|              | Neutrophilia | Normal    | Total     |
|--------------|--------------|-----------|-----------|
| EC POC+      | 4            | 61        | 65        |
| EC POC -     | 5            | 28        | 33        |
| <b>Total</b> | <b>9</b>     | <b>89</b> | <b>98</b> |

( $P = 0.1594$ )

### Table S14 A-D: Eosinophilia

Table S14 A

|              | Eosinophilia | Normal | Total |
|--------------|--------------|--------|-------|
| AP PCR +     | 14           | 24     | 38    |
| AP PCR -     | 15           | 85     | 100   |
| <b>Total</b> | 29           | 109    | 138   |

( $P = 0.0090$ )\*

Table S14 B

|              | Eosinophilia | Normal | Total |
|--------------|--------------|--------|-------|
| AP POC+      | 11           | 21     | 32    |
| AP POC-      | 11           | 57     | 68    |
| <b>Total</b> | 22           | 78     | 100   |

( $P = 0.0679$ )

Table S14 C

|              | Eosinophilia | Normal | Total |
|--------------|--------------|--------|-------|
| EC PCR +     | 16           | 36     | 52    |
| EC PCR -     | 13           | 73     | 86    |
| <b>Total</b> | 29           | 109    | 138   |

( $P = 0.0332$ )\*

Table S14 D

|              | Eosinophilia | Normal | Total |
|--------------|--------------|--------|-------|
| EC POC+      | 15           | 51     | 66    |
| EC POC -     | 7            | 27     | 34    |
| <b>Total</b> | 22           | 78     | 100   |

( $P = 1$ )

Eosinophilia is significantly associated with AP PCR and EC PCR positive test results.

### Table S15 A-D: Thrombocytopenia

Table S15 A

|              | Thrombocytopenia | Normal    | Total      |
|--------------|------------------|-----------|------------|
| AP PCR +     | 26               | 11        | 37         |
| AP PCR -     | 46               | 53        | 99         |
| <b>Total</b> | <b>72</b>        | <b>64</b> | <b>136</b> |

( $P = 0.0199$ )\*

Table S15 B

|              | Thrombocytopenia | Normal    | Total     |
|--------------|------------------|-----------|-----------|
| AP POC+      | 28               | 4         | 32        |
| AP POC -     | 28               | 38        | 66        |
| <b>Total</b> | <b>56</b>        | <b>42</b> | <b>98</b> |

( $P = 0.0001$ )\*

Table S15 C

|              | Thrombocytopenia | Normal    | Total      |
|--------------|------------------|-----------|------------|
| EC PCR +     | 44               | 8         | 52         |
| EC PCR -     | 28               | 56        | 84         |
| <b>Total</b> | <b>72</b>        | <b>64</b> | <b>136</b> |

( $P = 0.001$ )\*

Table S15 D

|              | Thrombocytopenia | Normal    | Total     |
|--------------|------------------|-----------|-----------|
| EC POC +     | 44               | 22        | 66        |
| EC POC -     | 12               | 20        | 32        |
| <b>Total</b> | <b>56</b>        | <b>42</b> | <b>98</b> |

( $P = 0.0088$ )\*

Thrombocytopenia is significantly associated with AP PCR, EC PCR, AP POC and EC POC positive test results.



**Table S16: Reference values for the clinical pathology parameters**

| Parameter                                        | Reference values               |
|--------------------------------------------------|--------------------------------|
| Packed cell volume (PCV)                         | 37-55 (%)                      |
| Red Blood cell count (RBC)                       | 5.5-8.5 ( $\times 10^{12}/L$ ) |
| Hemoglobin (HGB)                                 | 12-18 (g/dL)                   |
| Hematocrit (HCT)                                 | 37-55(%)                       |
| Mean corpuscular volume (MCV )                   | 60-77 (fL)                     |
| Mean Corpuscular hemoglobin concentration (MCHC) | 31-39 (g/dL)                   |
| Total protein (TP )                              | 6-7.5 (g/dL)                   |
| White blood cell count (WBC)                     | 6-17 ( $\times 10^9/L$ )       |
| Lymphocytes                                      | 1-4.8( $\times 10^9/L$ )       |
| Monocytes                                        | 0.20-1.5 ( $\times 10^9/L$ )   |
| Neutrophils                                      | 3-12 ( $\times 10^9/L$ )       |
| Eosinophils                                      | 0-0.8 ( $\times 10^9/L$ )      |
| Basophils                                        | 0.0.4 ( $\times 10^9/L$ )      |
